# Supplementary material for: Non-covalent interactions for carbonaceous materials: impacts of doping, curving and their combination
Source: Royal Society of Chemistry journal article supplement (doi:10.1039/c8cp02286k), 2018-01-01
Supplement: c8cp02286k1.pdf [file c8cp02286k1.pdf]

## **Supplementary Information**

### **Non-covalent Interactions for Carbonaceous Materials: Impacts of Doping, Curving and their Combination**

Chang Zhu, Qian Wang, Jiena Yun, Qiaoli Hu, Gang Yang\*

College of Resources and Environment & Chongqing Key Laboratory of Soil

Multi-scale Interfacial Process, Southwest University, Chongqing 400715, China

**Table S1.** Combined effects ( $\Omega$ ) during NaF adsorption onto the outer and inner surfaces of doped graphene flakes with different curvatures (D-cGFs), calculated at B3LYP/bs1 level of theory.

| dopant | $\rho$ (nm <sup>-1</sup> ) | Outer Surface      |                    | Inner surface      |                    |
|--------|----------------------------|--------------------|--------------------|--------------------|--------------------|
|        |                            | c <sub>A</sub> GFO | c <sub>Z</sub> GFO | c <sub>A</sub> GFI | c <sub>Z</sub> GFI |
| Be     | 0.492/0.491                | 8.1                | 9.7                | 40.3               | 65.5               |
|        | 0.983/0.982                | 3.3                | 8.3                | 101.2              | 111.5              |
|        | 1.475/1.503                | -1.6               | 6.3                | N.A. <sup>a</sup>  | N.A. <sup>a</sup>  |
| B      | 0.492/0.491                | -10.6              | -9.1               | 26.7               | 27.8               |
|        | 0.983/0.982                | -19.0              | -17.1              | N.A. <sup>a</sup>  | N.A. <sup>a</sup>  |
|        | 1.475/1.503                | -27.7              | -28.2              | N.A. <sup>a</sup>  | N.A. <sup>a</sup>  |
| N      | 0.492/0.491                | 2.0                | -0.6               | -3.5               | -0.7               |
|        | 0.983/0.982                | 4.9                | 0.0                | -7.8               | -0.8               |
|        | 1.475/1.503                | 6.9                | 0.3                | -15.6              | -2.2               |
| O      | 0.492/0.491                | 9.2                | 6.3                | -1.1               | 4.0                |
|        | 0.983/0.982                | 12.3               | 7.1                | -3.9               | 5.8                |
|        | 1.475/1.503                | 14.5               | 6.3                | -7.6               | 5.7                |

<sup>a</sup> The binding configuration is not geometrically stable.

**Table S2.** Combined effects ( $\Omega$ ) during NaF adsorption onto the outer and inner surfaces of doped graphene flakes with different curvatures (D-cGFs), calculated at M06-2X/bs2//B3LYP/bs1 level of theory.

| dopant | $\rho$ (nm <sup>-1</sup> ) | Outer Surface      |                    | Inner surface      |                    |
|--------|----------------------------|--------------------|--------------------|--------------------|--------------------|
|        |                            | c <sub>A</sub> GFo | c <sub>Z</sub> GFo | c <sub>A</sub> GFi | c <sub>Z</sub> GFi |
| Be     | 0.492/0.491                | 14.3               | 16.4               | 36.6               | 62.3               |
|        | 0.983/0.982                | 9.0                | 15.4               | 96.9               | 110.2              |
|        | 1.475/1.503                | 4.1                | 16.5               | N.A. <sup>a</sup>  | N.A. <sup>a</sup>  |
| B      | 0.492/0.491                | -7.7               | -6.8               | 21.4               | 22.0               |
|        | 0.983/0.982                | -18.2              | -16.1              | N.A. <sup>a</sup>  | N.A. <sup>a</sup>  |
|        | 1.475/1.503                | -27.9              | -26.7              | N.A. <sup>a</sup>  | N.A. <sup>a</sup>  |
| N      | 0.492/0.491                | 1.8                | 0.3                | -3.6               | -0.9               |
|        | 0.983/0.982                | 5.9                | 1.7                | -9.4               | -3.6               |
|        | 1.475/1.503                | 8.8                | 3.6                | -15.1              | -6.3               |
| O      | 0.492/0.491                | 16.8               | 14.7               | -1.9               | 3.1                |
|        | 0.983/0.982                | 20.7               | 17.9               | -6.1               | 3.8                |
|        | 1.475/1.503                | 23.0               | 19.3               | -8.3               | 3.8                |

<sup>a</sup> The binding configuration is not geometrically stable.

**Table S3.** Combined effects ( $\Omega$ ) during NaF adsorption onto the outer and inner surfaces of doped graphene flakes with different curvatures (D-cGFs), calculated at cam-B3LYP/bs2//B3LYP/bs1 level of theory.

| dopant | $\rho$ (nm <sup>-1</sup> ) | Outer Surface      |                    | Inner surface      |                    |
|--------|----------------------------|--------------------|--------------------|--------------------|--------------------|
|        |                            | c <sub>A</sub> GFO | c <sub>Z</sub> GFO | c <sub>A</sub> GFi | c <sub>Z</sub> GFi |
| Be     | 0.492/0.491                | 11.4               | 18.6               | 42.5               | 53.0               |
|        | 0.983/0.982                | 6.0                | 18.0               | 106.2              | 112.3              |
|        | 1.475/1.503                | 1.4                | 12.3               | N.A. <sup>a</sup>  | N.A. <sup>a</sup>  |
| B      | 0.492/0.491                | -5.7               | -5.5               | 18.1               | 18.1               |
|        | 0.983/0.982                | -16.9              | -16.1              | N.A. <sup>a</sup>  | N.A. <sup>a</sup>  |
|        | 1.475/1.503                | -26.6              | -27.5              | N.A. <sup>a</sup>  | N.A. <sup>a</sup>  |
| N      | 0.492/0.491                | 1.6                | -0.8               | -2.9               | 0.1                |
|        | 0.983/0.982                | 4.8                | 0.1                | -8.4               | -1.6               |
|        | 1.475/1.503                | 7.4                | 1.1                | -15.1              | -3.5               |
| O      | 0.492/0.491                | 9.0                | 5.8                | -2.6               | 2.9                |
|        | 0.983/0.982                | 12.9               | 7.4                | -6.6               | 4.1                |
|        | 1.475/1.503                | 15.4               | 7.6                | -10.0              | 4.3                |

<sup>a</sup> The binding configuration is not geometrically stable.

**Table S4.** Combined effects ( $\Omega$ ) during NaF adsorption onto the outer and inner surfaces of doped graphene flakes with different curvatures (D-cGFs), calculated at cam-B3LYP-D3/bs2//B3LYP/bs1 level of theory.

| dopant | $\rho$ (nm <sup>-1</sup> ) | Outer Surface                  |                                | Inner surface                  |                                |
|--------|----------------------------|--------------------------------|--------------------------------|--------------------------------|--------------------------------|
|        |                            | c <sub>A</sub> GF <sub>o</sub> | c <sub>Z</sub> GF <sub>o</sub> | c <sub>A</sub> GF <sub>i</sub> | c <sub>Z</sub> GF <sub>i</sub> |
| Be     | 0.492/0.491                | 11.7                           | 18.6                           | 43.4                           | 54.7                           |
|        | 0.983/0.982                | 6.0                            | 17.4                           | 104.7                          | 110.7                          |
|        | 1.475/1.503                | 1.1                            | 9.7                            | N.A. <sup>a</sup>              | N.A. <sup>a</sup>              |
| B      | 0.492/0.491                | -5.9                           | -6.1                           | 16.4                           | 16.5                           |
|        | 0.983/0.982                | -17.2                          | -16.9                          | N.A. <sup>a</sup>              | N.A. <sup>a</sup>              |
|        | 1.475/1.503                | -26.8                          | -28.5                          | N.A. <sup>a</sup>              | N.A. <sup>a</sup>              |
| N      | 0.492/0.491                | 1.6                            | -0.6                           | -2.4                           | 0.4                            |
|        | 0.983/0.982                | 5.4                            | 0.8                            | -7.4                           | -0.8                           |
|        | 1.475/1.503                | 8.6                            | 2.2                            | -9.2                           | -1.8                           |
| O      | 0.492/0.491                | 10.5                           | 7.6                            | -2.3                           | 3.2                            |
|        | 0.983/0.982                | 14.8                           | 9.8                            | -5.7                           | 4.5                            |
|        | 1.475/1.503                | 17.8                           | 10.3                           | -7.9                           | 4.6                            |

<sup>a</sup> The binding configuration is not geometrically stable.

**Table S5.** Combined effects ( $\Omega$ ) during NaF adsorption onto the outer and inner surfaces of doped graphene flakes with different curvatures (D-cGFs), calculated at vdW-DF level of theory.

| dopant | $\rho$ (nm <sup>-1</sup> ) | Outer Surface      |                    | Inner surface      |                    |
|--------|----------------------------|--------------------|--------------------|--------------------|--------------------|
|        |                            | c <sub>A</sub> GFO | c <sub>Z</sub> GFO | c <sub>A</sub> GFI | c <sub>Z</sub> GFI |
| Be     | 0.492/0.491                | 12.3               | 9.9                | 30.2               | 81.0               |
|        | 0.983/0.982                | 6.8                | 1.1                | 84.3               | 98.2               |
|        | 1.475/1.503                | 2.6                | -0.7               | N.A. <sup>a</sup>  | N.A. <sup>a</sup>  |
| B      | 0.492/0.491                | -11.7              | -8.9               | 32.2               | 34.1               |
|        | 0.983/0.982                | -17.3              | -14.7              | N.A. <sup>a</sup>  | N.A. <sup>a</sup>  |
|        | 1.475/1.503                | -23.1              | -22.8              | N.A. <sup>a</sup>  | N.A. <sup>a</sup>  |
| N      | 0.492/0.491                | 3.3                | 0.7                | -3.8               | -0.8               |
|        | 0.983/0.982                | 6.2                | 1.7                | -10.6              | -2.8               |
|        | 1.475/1.503                | 9.2                | 3.3                | -18.5              | -4.8               |
| O      | 0.492/0.491                | 14.2               | 12.2               | 0.9                | 4.9                |
|        | 0.983/0.982                | 16.4               | 12.5               | -4.0               | 4.4                |
|        | 1.475/1.503                | 19.2               | 13.2               | -7.9               | 3.9                |

<sup>a</sup> The binding configuration is not geometrically stable.
